# Supplementary material for: Association of Endotoxemia with Low-Grade Inflammation, Metabolic Syndrome and Distinct Response to Lipopolysaccharide in Type 1 Diabetes
Source: MDPI journal article supplement (doi:10.3390/biomedicines11123269), 2023-12-10
Supplement: s1 [file s1]

# Supplementary materials for “Association of endotoxaemia with low grade inflammation, metabolic syndrome and distinct response to LPS in type 1 diabetes”

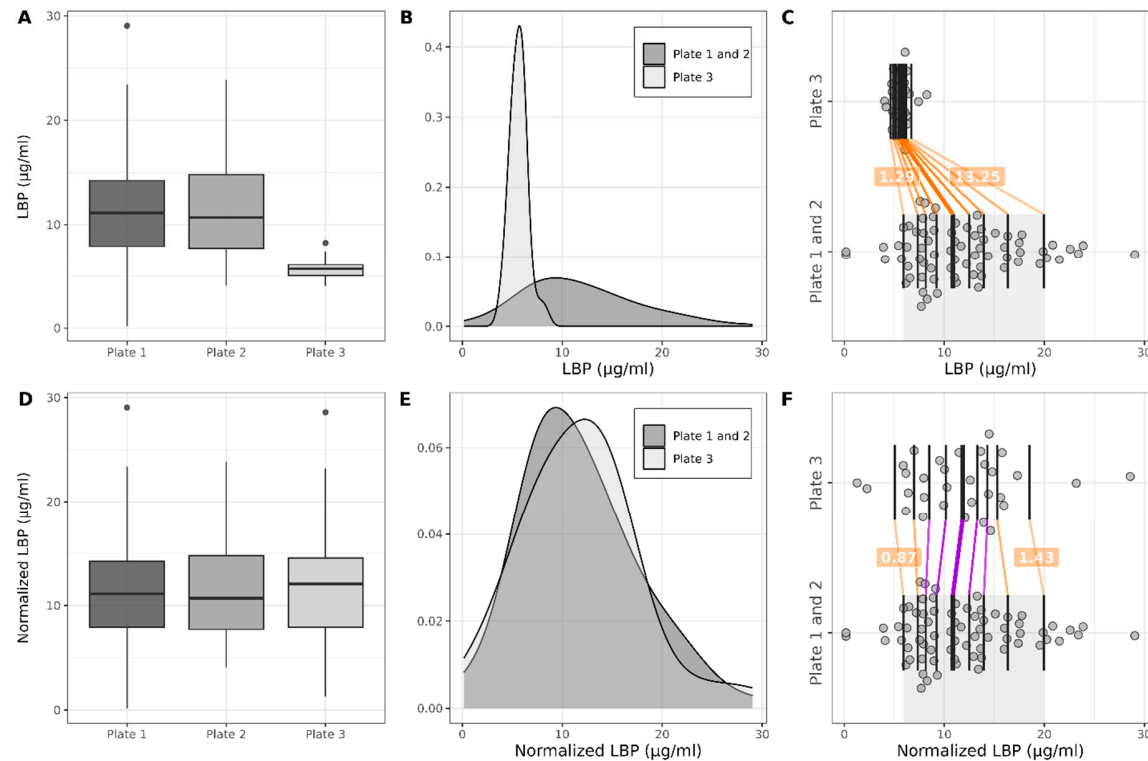

**Supplemental Figure 1.** Illustrations for LBP before and after the normalization. Boxplots by plates, density plots, and scatterplots with deciles for LBP raw data (upper panels) and after normalization using location-scale transformation between pooled plates 1 and 2 and plate 3 (lower panels), location parameter  $\hat{\mu} = -24.83$ , scale parameter  $\hat{\sigma} = 6.475$  are used for transformation of plate 3.

**Supplemental Table 1.** Characteristics of subjects T1D and controls

| Phenotype                                                       | Control (N=33)     | T1D (N=74)         | p      |
|-----------------------------------------------------------------|--------------------|--------------------|--------|
| Male gender, N (%)                                              | 14 (42.4 %)        | 28 (37.8 %)        | 0.81   |
| Age, years                                                      | 35 (30 - 44)       | 43 (34 - 51)       | 0.013  |
| BMI, kg/m <sup>2</sup>                                          | 24.3 (22.3 - 27.9) | 24.9 (22.6 - 28.4) | 0.39   |
| Waist/height ratio                                              | 0.47 (0.44 - 0.51) | 0.49 (0.44 - 0.56) | 0.16   |
| Metabolic syndrome                                              | 4 (12.1 %)         | 31 (41.9 %)        | 0.005  |
| Smokers, N (%)                                                  | 9 (27.3 %)         | 20 (27.0 %)        | 1.00   |
| Hypertension, N (%)                                             | 7 (21.2 %)         | 35 (47.3 %)        | 0.019  |
| Length of diabetes, Years                                       | -                  | 21 (13 - 32)       | -      |
| Retinopathy, N (%)                                              | -                  | 32 (43.2 %)        | -      |
| CVD, N (%)                                                      | 0 (0 %)            | 9 (12.2 %)         | NS     |
| On ACEI/ARB, N (%)                                              | 0 (0 %)            | 15 (20.3 %)        | NS     |
| On lipid lowering medication, N (%)                             | 2 (6.1 %)          | 17 (23.0 %)        | 0.066  |
| Autoimmune thyroid disease, N (%)                               | 1 (3 %)            | 19 (25.7 %)        | 0.012  |
| Hemoglobin A1C, %                                               | 5.2 (5.0 - 5.5)    | 7.7 (6.9 - 9.3)    | <0.001 |
| Hemoglobin A1C mmol/mol                                         | 31.4 (29.3 – 34.5) | 56.5 (49.1 – 73.6) | <0.001 |
| Estimated glomerular filtration rate, ml/min/1.73m <sup>2</sup> | 106 (94 - 113)     | 108 (91 - 117)     | 0.39   |
| Albumin/creatinine ratio in urine, mg/mmol                      | 0.32 (0.11 - 0.76) | 0.57 (0.23 - 1.84) | 0.013  |
| Total cholesterol, mmol/l                                       | 4.7 (4.5 - 5.1)    | 5.0 (4.5 - 5.8)    | 0.14   |
| Low density lipoproteins, mmol/l                                | 2.8 (2.4 - 3.2)    | 3.0 (2.3 - 3.4)    | 0.77   |
| High density lipoproteins, mmol/l                               | 1.43 (1.27 - 1.61) | 1.5 (1.3 - 1.9)    | 0.05   |
| Triglycerides, mmol/l                                           | 0.98 (0.79 - 1.65) | 1.2 (0.9 - 1.5)    | 0.21   |
| Alanine aminotransaminase, U/l                                  | 21 (17 - 29)       | 19 (15 - 28)       | 0.18   |
| Aspartate aminotransferase, U/l                                 | 25 (22 - 29)       | 22 (19 - 31)       | 0.13   |
| Gamma-glutamyltransferase, U/l                                  | 16 (14 - 22)       | 16 (13 - 23)       | 0.93   |
| Bilirubin, µmol/l                                               | 10.5 (7.1 – 15.0)  | 9.3 (7.0 – 12.0)   | 0.37   |
| CRP, mg/l                                                       | 0.5 (0.5 - 0.5)    | 0.9 (0.5 - 2.9)    | <0.001 |
| Haemoglobin, g/l                                                | 140 (127 - 152)    | 140 (132 - 149)    | 0.84   |

|                       |                    |                    |        |
|-----------------------|--------------------|--------------------|--------|
| Erythrocytes, 10x12/L | 4.6 (4.2 - 5.1)    | 4.7 (4.4 - 5.0)    | 0.62   |
| Leukocytes, 10x9/L    | 6.2 (5.2 - 6.9)    | 6.2 (5.1 - 7.3)    | 0.90   |
| Thrombocytes, 10x9/L  | 269 (225 - 301)    | 260 (230 - 288)    | 0.86   |
| eGDR                  | 7.1 (5.5 - 7.7)    | 3.3 (1.6 - 5.7)    | <0.001 |
| FLI                   | 17.8 (6.6 - 34.6)  | 21.7 (9.9 - 48.2)  | 0.19   |
| HSI                   | 34.3 (30.8 - 40.2) | 33.4 (29.9 - 39.5) | 0.30   |

**Supplemental Table 2.** Comparisons of deciles of inflammatory markers in T1D patients stratified according to the presence of metabolic syndrome.

| Variable            | n  | m  | Decile 1<br>(10%)                | Decile 2<br>(20%)                | Decile 3<br>(30%)                | Decile 4<br>(40%)                | Decile 5<br>(50%)              | Decile 6<br>(60%)               | Decile 7<br>(70%)                | Decile 8<br>(80%)                | Decile 9<br>(90%)                 |
|---------------------|----|----|----------------------------------|----------------------------------|----------------------------------|----------------------------------|--------------------------------|---------------------------------|----------------------------------|----------------------------------|-----------------------------------|
| hsCRP, mg/l         | 42 | 28 | -0.09 (-0.28,0.15),<br>p=0.44    | 0 (-0.24,0.33),<br>p=0.971       | 0.09 (-0.22,0.53),<br>p=0.595    | 0.2 (-0.21,0.76),<br>p=0.371     | 0.34 (-0.22,1.01),<br>p=0.25   | 0.48 (-0.22,1.34),<br>p=0.182   | 0.62 (-0.29,1.67),<br>p=0.159    | 0.78 (-1.24,2.49),<br>p=0.414    | 0 (-2.14,2.83),<br>p=0.998        |
| LPS, EU/ml          | 42 | 29 | 0.01 (-0.03,0.05),<br>p=0.78     | 0.03 (-0.01,0.08),<br>p=0.193    | 0.05 (0,0.1),<br>p=0.044         | 0.07 (0.02,0.13),<br>p=0.01      | 0.09 (0.03,0.17),<br>p=0.002   | 0.11 (0.04,0.21),<br>p=0.002    | 0.15 (0.05,0.24),<br>p=0.004     | 0.17 (0.05,0.26),<br>p=0.013     | 0.16 (-0.02,0.27),<br>p=0.091     |
| EndoCAb IgG, GMU/ml | 41 | 29 | -11.74 (-30.66,7.65),<br>p=0.232 | -8.35 (-29.38,14.77),<br>p=0.472 | -5.21 (-27.25,19.49),<br>p=0.666 | -1.08 (-24.89,24.83),<br>p=0.931 | 3.4 (-24.59,31.71),<br>p=0.804 | 6.61 (-37.38,39.49),<br>p=0.701 | 0.76 (-47.83,47.57),<br>p=0.978  | -8.9 (-55.47,50.36),<br>p=0.72   | -5.56 (-151.01,130.5),<br>p=0.869 |
| EndoCAb IgM, MMU/ml | 42 | 28 | 1.37 (-8.72,11.15),<br>p=0.791   | -0.23 (-10.52,9.65),<br>p=0.964  | -1.78 (-12.92,8.83),<br>p=0.738  | -3.67 (-18.01,8.55),<br>p=0.555  | -6.77 (-25.8,7.96),<br>p=0.391 | -12.6 (-33.33,5.95),<br>p=0.206 | -19.83 (-41.22,1.08),<br>p=0.063 | -27.32 (-54.53,14.25),<br>p=0.15 | -25 (-141.55,75.6),<br>p=0.281    |
| LBP, µg/ml          | 42 | 29 | 2.45 (0.56,4.99),<br>p=0.01      | 1.49 (-0.45,3.71),<br>p=0.134    | 0.92 (-1.25,3.11),<br>p=0.404    | 0.43 (-2.02,2.7),<br>p=0.722     | -0.14 (-2.9,2.28),<br>p=0.914  | -0.91 (-4.18,1.79),<br>p=0.523  | -2.02 (-5.84,1.34),<br>p=0.233   | -3.54 (-7.34,2.49),<br>p=0.16    | -3.64 (-9.13,4.79),<br>p=0.395    |
| LPS/HDL ratio       | 42 | 29 | 0.04 (0,0.08),<br>p=0.079        | 0.05 (0,0.09),<br>p=0.037        | 0.06 (0.01,0.1),<br>p=0.018      | 0.06 (0.02,0.11),<br>p=0.007     | 0.07 (0.02,0.13),<br>p=0.003   | 0.08 (0.03,0.17),<br>p=0.001    | 0.1 (0.03,0.3),<br>p=0.002       | 0.19 (0.04,0.35),<br>p=0.004     | 0.28 (0.09,0.48),<br>p=0.004      |
| Calprotectin, µg/g  | 35 | 27 | -0.88 (-2.77,1.58),<br>p=0.441   | 0.61 (-1.73,4.13),<br>p=0.656    | 2.22 (-0.78,7.25),<br>p=0.172    | 4.3 (0.23,9.98),<br>p=0.036      | 6.9 (1.24,11.81),<br>p=0.014   | 8.72 (2.47,13.13),<br>p=0.011   | 9.39 (-13.65,13.98),<br>p=0.18   | 5.35 (-18.29,14.99),<br>p=1      | -9.99 (-21.82,25.46),<br>p=0.218  |

n – complete cases in T1D patients without metabolic syndrome; m – complete cases in T1D patients with metabolic syndrome.

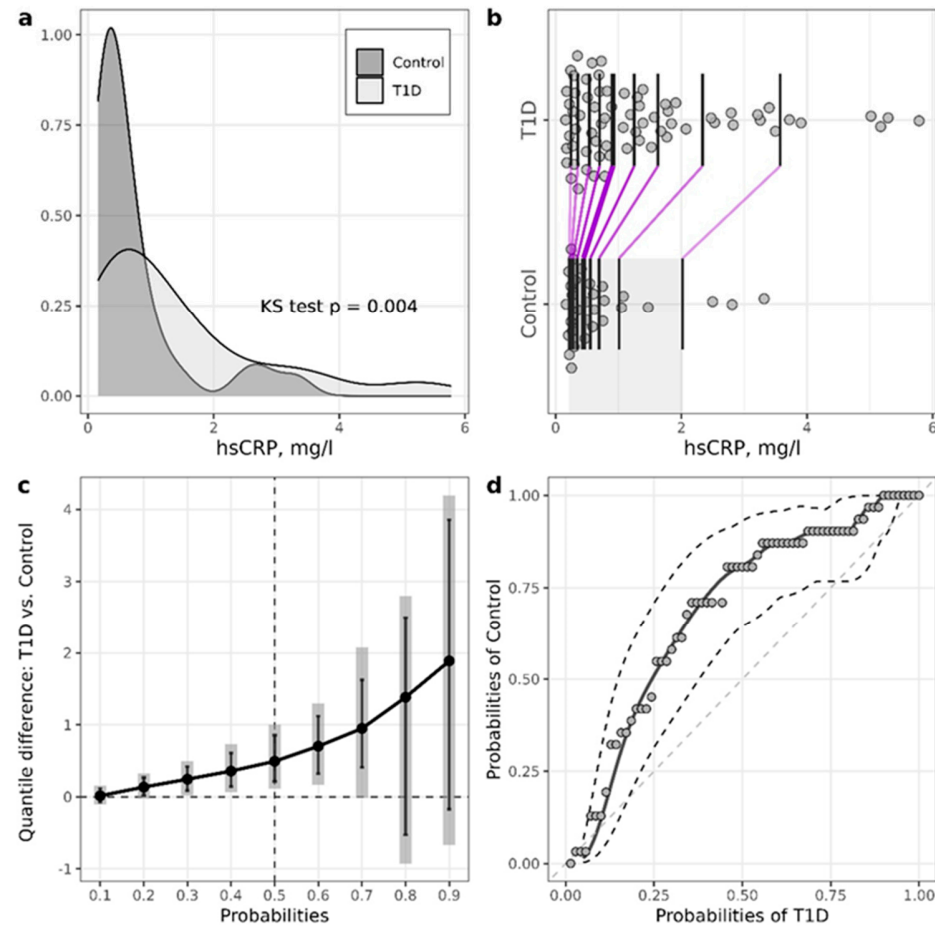

**Figure 2.** Illustrations for comparison of hsCRP levels between control and T1D groups. a – plots of densities in control and T1D, p-value of Kolmogorov-Smirnov (KS) test for the equality of distributions; b – one-dimensional scatterplots for control and T1D, vertical bars represents deciles of both groups (R library rognme); c – quantile difference (T1D - control) plot constructed at deciles, estimates obtained using two-sample smoothed empirical likelihood method (R library EL), error bars represent 95% pointwise CI's, shaded bars representing 95% simultaneous confidence bands for 9 deciles; d – probabilities of T1D versus probabilities of control (PP-plot) with estimate and 95% pointwise CI's obtained by two-sample smoothed empirical likelihood method (R library EL). Bandwidths for kernel estimation in c and d were selected using the method by Sheather and Jones (function bw.SJ in R).

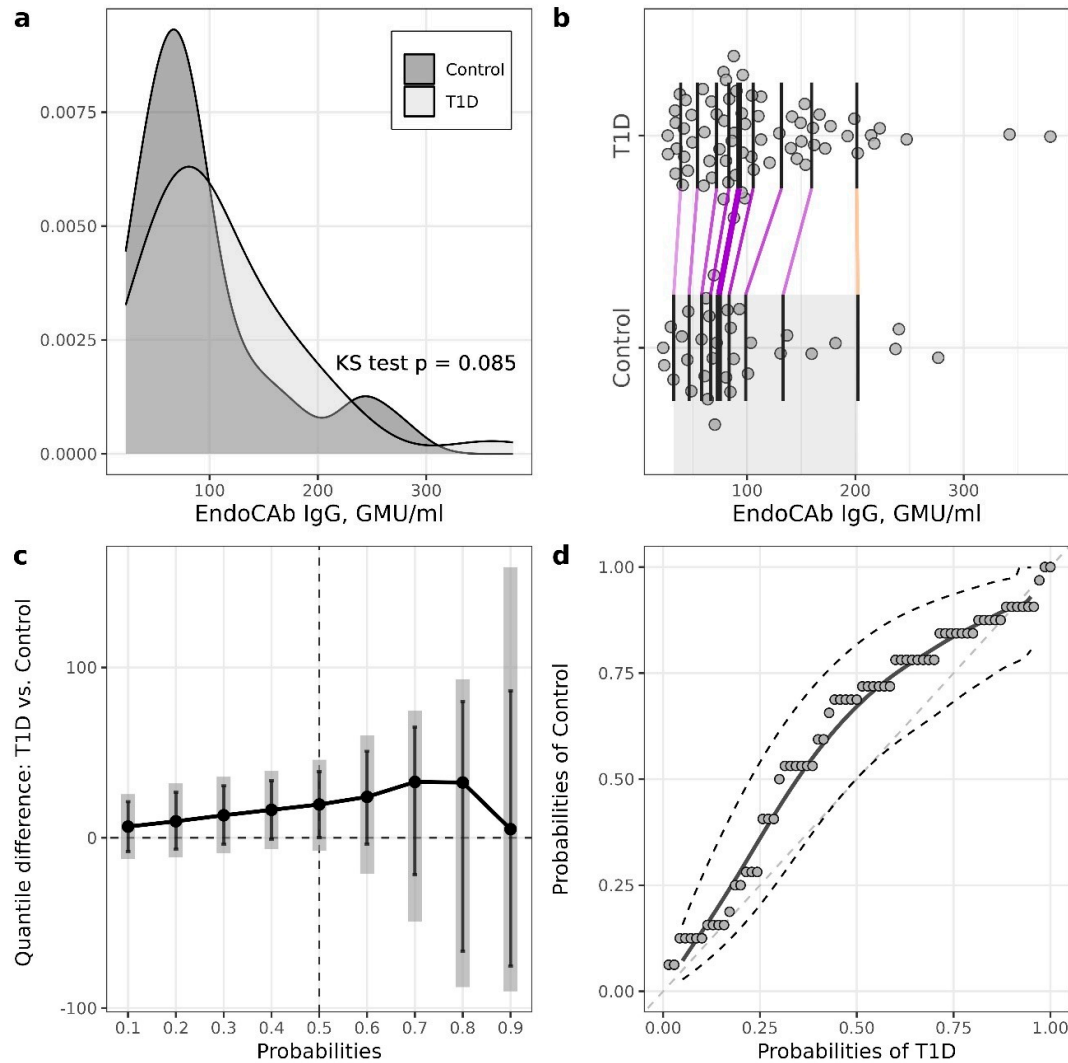

**Supplemental Figure 3.** Illustrations for comparison of EndoCAB IgG levels between control and T1D groups. a – plots of densities in control and T1D, p-value of Kolmogorov-Smirnov (KS) test for the equality of distributions; b – one-dimensional scatterplots for control and T1D, vertical bars represent deciles of both groups (R library `rogme`); c – quantile difference (T1D - control) plot constructed at deciles, estimates obtained using two-sample smoothed empirical likelihood method (R library `EL`), error bars represent 95% pointwise CI's, shaded bars representing 95% simultaneous confidence bands for 9 deciles; d – probabilities of T1D versus probabilities of control (PP-plot) with an estimate and 95% pointwise CI's obtained by two-sample smoothed empirical likelihood method (R library `EL`). Bandwidths for kernel estimation in c and d were selected using the method by Sheather and Jones (function `bw.SJ` in R).

**Supplemental Table 3.** Inflammatory marker analysis in patients with T1D stratified by metabolic syndrome.

| Variable             | No metabolic syndrome (N = 43) | Metabolic syndrome (N = 31) | P Wilcoxon | P ANCOVA | P Lepage | P KS test |
|----------------------|--------------------------------|-----------------------------|------------|----------|----------|-----------|
| hsCRP, mg/l          | 0.80 (0.49 - 1.53)             | 1.23 (0.38 - 2.17)          | 0.41       | 0.99     | 0.55     | 0.39      |
| LPS, EU/ml           | 0.34 (0.30 - 0.40)             | 0.42 (0.35 - 0.56)          | 0.009      | 0.020    | 0.018    | 0.009     |
| EndoCAB IgG, GMU/ml  | 89.5 (67.1 - 150.2)            | 96.0 (59.1 - 141.6)         | 0.84       | 0.54     | 0.88     | 0.85      |
| Endo CAB IgM, MMU/ml | 46.6 (34.2 - 85.2)             | 43.7 (31.3 - 60.4)          | 0.33       | 0.31     | 0.24     | 0.18      |
| LBP, µg/ml           | 11.1 (7.9 - 16.3)              | 11.1 (7.9 - 13.3)           | 0.89       | 0.66     | 0.20     | 0.54      |
| LPS/HDL              | 0.22 (0.17 - 0.26)             | 0.28 (0.24 - 0.38)          | 0.001      | <0.001   | 0.004    | 0.003     |
| Calprotectin, µg/g   | 3.8 (2.7 - 8.6)                | 12.5 (3.2 - 18.4)           | 0.18       | 0.23     | 0.40     | 0.057     |

KS – Kolmogorov-Smirnov test for equality of two distributions. ANCOVA on rank-transformed data with covariates: sex, diabetes duration, age, and BMI

**Supplemental Table 4.** Markers of endotoxaemia and inflammation in the study groups.

| Phenotype           | Control             |    | Type 1 diabetes     |    | P        |        |        | Difference of deciles: T1D - Control |                            |                              |                             |                             |                             |                             |                             |                             |
|---------------------|---------------------|----|---------------------|----|----------|--------|--------|--------------------------------------|----------------------------|------------------------------|-----------------------------|-----------------------------|-----------------------------|-----------------------------|-----------------------------|-----------------------------|
|                     | Median (IQR)        | N  | Median (IQR)        | N  | Wilcoxon | ANCOVA | Lepage | 10%                                  | 20%                        | 30%                          | 40%                         | 50%                         | 60%                         | 70%                         | 80%                         | 90%                         |
| hsCRP, mg/l         | 0.47 (0.26 - 0.75)  | 31 | 0.84 (0.49 - 1.78)  | 70 | 0.002    | 0.042  | 0.008  | 0.01 (-0.07, 0.11), p=0.76           | 0.13 (0.02, 0.27), p=0.024 | 0.24 (0.09, 0.42), p=0.004   | 0.36 (0.14, 0.61), p=0.001  | 0.49 (0.21, 0.86), p=0.001  | 0.7 (0.32, 1.12), p=0.002   | 0.95 (0.41, 1.63), p=0.008  | 1.38 (-0.53, 2.5), p=0.12   | 1.89 (-0.17, 3.86), p=0.08  |
| LPS, EU/ml          | 0.39 (0.31 - 0.49)  | 31 | 0.36 (0.31 - 0.45)  | 71 | 0.49     | 0.25   | 0.74   | 0.01 (-0.02, 0.04), p=0.47           | 0 (-0.04, 0.04), p=0.99    | -0.01 (-0.06, 0.03), p=0.64  | -0.02 (-0.07, 0.03), p=0.44 | -0.03 (-0.09, 0.03), p=0.34 | -0.03 (-0.12, 0.03), p=0.31 | -0.04 (-0.16, 0.05), p=0.33 | -0.05 (-0.19, 0.09), p=0.48 | -0.04 (-0.17, 0.08), p=0.55 |
| EndoCAB IgG, GMU/ml | 71.1 (55.7 - 101.5) | 32 | 92.6 (65.8 - 148.6) | 70 | 0.091    | 0.32   | 0.23   | 6.55 (-8.1, 21.18), p=0.39           | 9.67 (-6.78, 26.8), p=0.26 | 13.22 (-3.88, 30.46), p=0.13 | 16.4 (-0.9, 33.6), p=0.063  | 19.5 (0.2, 38.8), p=0.048   | 24.0 (-3.8, 50.7), p=0.075  | 32.8 (-21.6, 65.1), p=0.17  | 32.5 (-66.6, 79.9), p=0.37  | 5.1 (-75.2, 86.2), p=0.95   |

|                           |                          |    |                          |    |      |       |       |                                          |                                          |                                        |                                       |                                        |                                        |                                       |                                         |                                           |
|---------------------------|--------------------------|----|--------------------------|----|------|-------|-------|------------------------------------------|------------------------------------------|----------------------------------------|---------------------------------------|----------------------------------------|----------------------------------------|---------------------------------------|-----------------------------------------|-------------------------------------------|
| EndoCAb<br>IgM,<br>MMU/ml | 48.3<br>(27.4 -<br>69.6) | 32 | 45.8<br>(33.4 -<br>69.5) | 70 | 0.64 | 0.093 | 0.60  | 1.71 (-<br>5.66,<br>8.62),<br>p=0.64     | 3.02 (-<br>5.54,<br>10.31),<br>p=0.46    | 3.26 (-<br>7.68,<br>11.71),<br>p=0.51  | 2.65 (-<br>10.82,<br>13.5),<br>p=0.68 | 1.58 (-<br>13.71,<br>16.02),<br>p=0.84 | 1.62 (-<br>19.48,<br>18.49),<br>p=0.85 | 2.22 (-<br>33.0,<br>22.8),<br>p=0.85  | -4.34 (-<br>46.67,<br>31.85),<br>p=0.85 | -9.44 (-<br>74.85, -<br>37.13),<br>p=0.69 |
| LBP, µg/ml                | 10.1<br>(7.0 -<br>14.2)  | 32 | 11.1<br>(7.9 -<br>14.0)  | 71 | 0.60 | 0.84  | 0.72  | 0.49 (-<br>1.7,<br>4.81),<br>p=0.64      | 0.67 (-<br>1.13,<br>2.59),<br>p=0.44     | 0.73 (-<br>1.41,<br>2.62),<br>p=0.48   | 0.77 (-<br>2.64,<br>2.99),<br>p=0.54  | 0.53 (-<br>2.84,<br>3.18),<br>p=0.81   | -0.42 (-<br>2.45,<br>3.22),<br>p=0.78  | -0.03 (-<br>1.89,<br>2.73),<br>p=0.98 | 1.6 (-<br>1.07,<br>5.37),<br>p=0.29     | 4.84<br>(1.39,<br>7.94),<br>p=0.006       |
| LPS/HDL<br>ratio          | 0.24<br>(0.20 –<br>0.36) | 31 | 0.24<br>(0.19 –<br>0.30) | 71 | 0.27 | 0.087 | 0.48  | -0.04 (-<br>0.06, -<br>0.01),<br>p=0.018 | -0.02 (-<br>0.05,<br>0.01),<br>p=0.11    | -0.01 (-<br>0.05,<br>0.02),<br>p=0.46  | 0 (-0.07,<br>0.03),<br>p=0.82         | -0.01 (-<br>0.09,<br>0.03),<br>p=0.81  | -0.04 (-<br>0.13,<br>0.04),<br>p=0.45  | -0.05 (-<br>0.25,<br>0.03),<br>p=0.15 | -0.18 (-<br>0.26,<br>0.03),<br>p=0.19   | -0.13 (-<br>0.39,<br>0.06),<br>p=0.23     |
| Calprotecti<br>n, µg/g    | 6.4<br>(3.9 –<br>10.3)   | 30 | 5.8<br>(2.7 –<br>16.2)   | 62 | 0.59 | 0.56  | 0.002 | -2.14 (-<br>3.34, -<br>0.44),<br>p=0.017 | -1.86 (-<br>3.26, -<br>0.40),<br>p=0.016 | -1.54 (-<br>3.21,<br>0.14),<br>p=0.071 | -1.12 (-<br>3.2,<br>1.11),<br>p=0.30  | -0.47 (-<br>3.18,<br>2.81),<br>p=0.74  | 0.7 (-3.0,<br>7.4),<br>p=0.71          | 4.7 (-2.1,<br>10.7),<br>p=0.24        | 8.0 (-1.8,<br>17.9),<br>p=0.083         | 13.9 (-<br>3.6,<br>29.0),<br>p=0.24       |

ANCOVA on rank-transformed data with covariates: sex, diabetes duration, age, and BMI

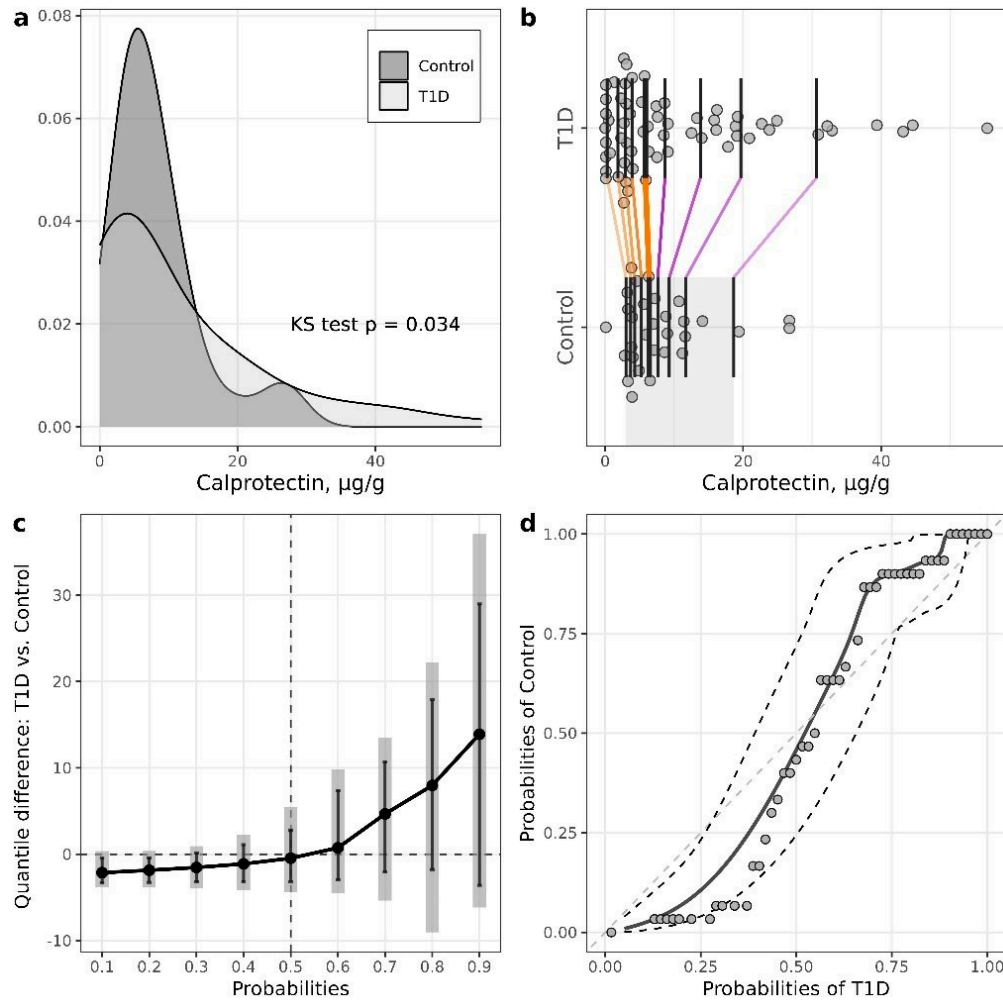

**Supplemental Figure 4.** Illustrations for comparison of calprotectin levels between control and T1D groups. a – plots of densities in control and T1D, a p-value of Kolmogorov-Smirnov (KS) test for the equality of distributions; b – one-dimensional scatterplots for control and T1D, vertical bars represents deciles of both groups (R library *rogme*); c – quantile difference (T1D - control) plot constructed at deciles, estimates obtained using two-sample smoothed empirical likelihood method (R library *EL*), error bars represent 95% pointwise CI's, shaded bars representing 95% simultaneous confidence bands for 9 deciles; d – probabilities of T1D versus probabilities of control (PP-plot) with estimate and 95% pointwise CI's obtained by two-sample smoothed empirical likelihood method (R library *EL*). Bandwidths for kernel estimation in c and d were selected using the method by Sheather and Jones (function *bw.SJ* in R).



**Supplemental Table 5.** Correlations in the type 1 diabetes group. Spearman correlation coefficient (95% CI) was calculated.

| Variable                          | CRO, mg/l                         | hsCRP, mg/l                      | LPS, EU/ml                       | endoCab IgG, GMU/ml              | endoCab IgM, MMU/ml              | LBP, µg/ml                       | LPS/HDL                          | Calprotectin, µg/g                |
|-----------------------------------|-----------------------------------|----------------------------------|----------------------------------|----------------------------------|----------------------------------|----------------------------------|----------------------------------|-----------------------------------|
| Serum glucose                     | 0.03, (-0.2, 0.26),<br>p=0.786    | 0.12, (-0.12, 0.34),<br>p=0.337  | 0.04, (-0.2, 0.27),<br>p=0.742   | 0, (-0.23, 0.24),<br>p=0.976     | -0.08, (-0.31, 0.16),<br>p=0.512 | 0.12, (-0.12, 0.34),<br>p=0.336  | 0.19, (-0.05, 0.41),<br>p=0.109  | 0.08, (-0.16, 0.32),<br>p=0.496   |
| HbA1c                             | 0.03, (-0.2, 0.25),<br>p=0.825    | 0.11, (-0.13, 0.34),<br>p=0.368  | -0.03, (-0.26, 0.21),<br>p=0.833 | 0.27, (0.03, 0.47),<br>p=0.026   | 0.11, (-0.13, 0.34),<br>p=0.366  | 0.05, (-0.19, 0.28),<br>p=0.707  | 0.05, (-0.19, 0.28),<br>p=0.706  | 0.03, (-0.21, 0.27),<br>p=0.783   |
| eGFR                              | -0.24, (-0.45, -0.01),<br>p=0.038 | -0.02, (-0.26, 0.21),<br>p=0.861 | -0.06, (-0.29, 0.18),<br>p=0.614 | -0.1, (-0.33, 0.13),<br>p=0.391  | -0.21, (-0.43, 0.03),<br>p=0.079 | 0.07, (-0.17, 0.29),<br>p=0.584  | 0.08, (-0.16, 0.31),<br>p=0.5    | 0.11, (-0.13, 0.34),<br>p=0.377   |
| Albumin/creatinine ratio in urine | 0.13, (-0.11, 0.35),<br>p=0.277   | 0.12, (-0.13, 0.35),<br>p=0.342  | -0.19, (-0.41, 0.06),<br>p=0.128 | -0.03, (-0.27, 0.21),<br>p=0.809 | -0.07, (-0.31, 0.17),<br>p=0.544 | -0.03, (-0.26, 0.21),<br>p=0.807 | -0.11, (-0.34, 0.13),<br>p=0.352 | 0.1, (-0.15, 0.33),<br>p=0.436    |
| Weight                            | 0.38, (0.16, 0.57),<br>p=0.001    | 0.07, (-0.17, 0.3),<br>p=0.568   | 0.04, (-0.2, 0.27),<br>p=0.751   | -0.08, (-0.31, 0.16),<br>p=0.496 | 0.02, (-0.21, 0.25),<br>p=0.862  | -0.01, (-0.25, 0.22),<br>p=0.916 | 0.06, (-0.18, 0.29),<br>p=0.617  | -0.07, (-0.3, 0.18),<br>p=0.595   |
| Body mass index                   | 0.55, (0.35, 0.7),<br>p=0         | 0.17, (-0.07, 0.39),<br>p=0.155  | 0.14, (-0.09, 0.37),<br>p=0.23   | 0.01, (-0.22, 0.25),<br>p=0.917  | 0.01, (-0.22, 0.25),<br>p=0.918  | 0.05, (-0.19, 0.28),<br>p=0.697  | 0.1, (-0.14, 0.33),<br>p=0.412   | -0.01, (-0.25, 0.23),<br>p=0.916  |
| Waist/height ratio                | 0.47, (0.26, 0.64),<br>p=0        | 0.23, (-0.01, 0.44),<br>p=0.057  | 0.14, (-0.1, 0.36),<br>p=0.243   | -0.08, (-0.31, 0.16),<br>p=0.508 | -0.11, (-0.34, 0.12),<br>p=0.345 | 0.03, (-0.2, 0.26),<br>p=0.781   | 0.16, (-0.08, 0.38),<br>p=0.193  | -0.09, (-0.32, 0.15),<br>p=0.473  |
| eGDR                              | -0.26, (-0.46, -0.03),<br>p=0.027 | -0.28, (-0.48, -0.04),<br>p=0.02 | 0.01, (-0.23, 0.24),<br>p=0.967  | -0.05, (-0.28, 0.18),<br>p=0.664 | 0.07, (-0.17, 0.3),<br>p=0.572   | 0.06, (-0.18, 0.29),<br>p=0.632  | -0.06, (-0.29, 0.18),<br>p=0.63  | 0.04, (-0.2, 0.28),<br>p=0.743    |
| HSI                               | 0.52, (0.31, 0.68),<br>p=0        | 0.21, (-0.03, 0.43),<br>p=0.088  | 0.13, (-0.11, 0.36),<br>p=0.283  | 0.04, (-0.21, 0.27),<br>p=0.77   | 0.04, (-0.2, 0.28),<br>p=0.728   | -0.03, (-0.26, 0.21),<br>p=0.832 | 0.14, (-0.1, 0.37),<br>p=0.25    | -0.06, (-0.3, 0.19),<br>p=0.624   |
| FLI                               | 0.48, (0.27, 0.64),<br>p=0        | 0.22, (-0.02, 0.43),<br>p=0.07   | 0.24, (0.01, 0.45),<br>p=0.04    | -0.08, (-0.31, 0.16),<br>p=0.514 | -0.06, (-0.29, 0.17),<br>p=0.603 | 0.06, (-0.18, 0.29),<br>p=0.63   | 0.23, (-0.01, 0.44),<br>p=0.053  | -0.06, (-0.29, 0.18),<br>p=0.641  |
| ALT                               | 0.02, (-0.21, 0.25),<br>p=0.859   | -0.04, (-0.27, 0.2),<br>p=0.742  | -0.07, (-0.3, 0.17),<br>p=0.575  | -0.09, (-0.32, 0.15),<br>p=0.445 | -0.07, (-0.3, 0.16),<br>p=0.543  | -0.07, (-0.29, 0.17),<br>p=0.585 | -0.04, (-0.27, 0.19),<br>p=0.726 | -0.02, (-0.26, 0.22),<br>p=0.883  |
| AST                               | 0, (-0.23, 0.23),<br>p=0.996      | -0.07, (-0.31, 0.17),<br>p=0.568 | -0.1, (-0.33, 0.14),<br>p=0.424  | 0, (-0.24, 0.24),<br>p=0.976     | -0.14, (-0.37, 0.1),<br>p=0.257  | 0.03, (-0.21, 0.27),<br>p=0.789  | -0.19, (-0.41, 0.05),<br>p=0.115 | 0.07, (-0.17, 0.32),<br>p=0.556   |
| GGT                               | 0.14, (-0.09, 0.36),<br>p=0.239   | 0.05, (-0.19, 0.28),<br>p=0.689  | -0.04, (-0.27, 0.2),<br>p=0.771  | -0.21, (-0.43, 0.03),<br>p=0.076 | -0.06, (-0.29, 0.17),<br>p=0.6   | -0.01, (-0.24, 0.23),<br>p=0.954 | -0.07, (-0.3, 0.17),<br>p=0.568  | -0.05, (-0.29, 0.19),<br>p=0.659  |
| Transglutaminase IgA              | -0.04, (-0.27, 0.19),<br>p=0.738  | -0.21, (-0.43, 0.03),<br>p=0.081 | 0.07, (-0.16, 0.3),<br>p=0.541   | 0.01, (-0.22, 0.25),<br>p=0.913  | 0.11, (-0.13, 0.34),<br>p=0.379  | 0.04, (-0.19, 0.28),<br>p=0.717  | 0.05, (-0.18, 0.28),<br>p=0.666  | -0.28, (-0.49, -0.04),<br>p=0.022 |
| Total bilirubin                   | -0.18, (-0.4, 0.05),<br>p=0.117   | -0.16, (-0.38, 0.08),<br>p=0.182 | 0, (-0.24, 0.23),<br>p=0.968     | -0.1, (-0.33, 0.14),<br>p=0.399  | 0.03, (-0.2, 0.27),<br>p=0.779   | 0, (-0.24, 0.23),<br>p=0.967     | -0.06, (-0.28, 0.18),<br>p=0.648 | -0.14, (-0.37, 0.1),<br>p=0.251   |
| Erythrocytes                      | -0.03, (-0.25, 0.2),<br>p=0.816   | 0, (-0.24, 0.23),<br>p=0.991     | 0.2, (-0.03, 0.42),<br>p=0.091   | -0.04, (-0.27, 0.2),<br>p=0.765  | 0.1, (-0.14, 0.33),<br>p=0.393   | -0.01, (-0.24, 0.22),<br>p=0.92  | 0.26, (0.02, 0.47),<br>p=0.03    | 0.09, (-0.16, 0.32),<br>p=0.494   |
| Hemoglobin                        | -0.15, (-0.37, 0.08),<br>p=0.207  | -0.06, (-0.29, 0.18),<br>p=0.623 | 0.18, (-0.06, 0.4),<br>p=0.14    | -0.2, (-0.42, 0.04),<br>p=0.1    | 0.04, (-0.19, 0.28),<br>p=0.715  | -0.07, (-0.3, 0.16),<br>p=0.549  | 0.33, (0.1, 0.53),<br>p=0.005    | 0.03, (-0.21, 0.27),<br>p=0.792   |
| Leukocytes                        | 0.1, (-0.13, 0.32),<br>p=0.391    | 0.18, (-0.06, 0.4),<br>p=0.13    | -0.06, (-0.29, 0.18),<br>p=0.62  | -0.07, (-0.3, 0.17),<br>p=0.589  | -0.06, (-0.29, 0.17),<br>p=0.605 | 0.15, (-0.09, 0.37),<br>p=0.211  | 0.04, (-0.19, 0.27),<br>p=0.723  | -0.07, (-0.3, 0.18),<br>p=0.588   |
| Total cholesterol                 | 0.29, (0.06, 0.49),<br>p=0.013    | 0.13, (-0.11, 0.36),<br>p=0.276  | 0.04, (-0.2, 0.27),<br>p=0.746   | 0.18, (-0.06, 0.4),<br>p=0.137   | 0.07, (-0.17, 0.3),<br>p=0.555   | 0.2, (-0.04, 0.42),<br>p=0.092   | -0.18, (-0.39, 0.06),<br>p=0.142 | 0.14, (-0.11, 0.37),<br>p=0.263   |
| High-density cholesterol          | 0.16, (-0.07, 0.38),<br>p=0.171   | 0.13, (-0.1, 0.36),<br>p=0.267   | -0.17, (-0.39, 0.06),<br>p=0.146 | 0.32, (0.09, 0.52),<br>p=0.006   | 0.26, (0.02, 0.47),<br>p=0.028   | 0.12, (-0.12, 0.34),<br>p=0.324  | -0.7, (-0.81, -0.54),<br>p=0     | -0.06, (-0.3, 0.18),<br>p=0.614   |
| Low-density cholesterol           | 0.21, (-0.02, 0.42),<br>p=0.075   | 0.04, (-0.19, 0.28),<br>p=0.723  | -0.08, (-0.31, 0.15),<br>p=0.48  | 0.04, (-0.19, 0.27),<br>p=0.729  | -0.05, (-0.28, 0.19),<br>p=0.683 | 0.17, (-0.07, 0.39),<br>p=0.164  | -0.01, (-0.24, 0.23),<br>p=0.95  | 0.22, (-0.03, 0.44),<br>p=0.08    |
| Tryglicerides                     | 0.12, (-0.11, 0.34),<br>p=0.312   | 0.13, (-0.11, 0.36),<br>p=0.282  | 0.49, (0.28, 0.66),<br>p=0       | -0.08, (-0.31, 0.16),<br>p=0.537 | 0, (-0.23, 0.24),<br>p=0.982     | -0.01, (-0.24, 0.22),<br>p=0.929 | 0.52, (0.31, 0.68),<br>p=0       | 0.04, (-0.21, 0.27),<br>p=0.776   |

|                          |                                  |                               |                               |                              |                               |                               |                                  |                               |
|--------------------------|----------------------------------|-------------------------------|-------------------------------|------------------------------|-------------------------------|-------------------------------|----------------------------------|-------------------------------|
| <b>Diabetes duration</b> | 0.14, (-0.09, 0.36),<br>p=0.224  | 0.15, (-0.09, 0.37), p=0.226  | -0.09, (-0.32, 0.15), p=0.463 | -0.07, (-0.3, 0.17), p=0.576 | 0.11, (-0.13, 0.34), p=0.354  | -0.09, (-0.31, 0.15), p=0.478 | -0.22, (-0.43, 0.02), p=0.069    | 0.02, (-0.22, 0.26), p=0.845  |
| <b>CRP</b>               | -                                | 0.61, (0.42, 0.75), p=0       | 0.13, (-0.11, 0.35), p=0.296  | 0.16, (-0.08, 0.38), p=0.192 | 0.01, (-0.23, 0.24), p=0.951  | 0.18, (-0.06, 0.4), p=0.137   | -0.04, (-0.27, 0.2), p=0.767     | -0.16, (-0.39, 0.09), p=0.197 |
| <b>hsCRP</b>             | 0.61, (0.42, 0.75),<br>p=0       | -                             | 0.18, (-0.06, 0.4), p=0.14    | 0.22, (-0.02, 0.44), p=0.07  | 0, (-0.24, 0.23),<br>p=0.972  | 0.36, (0.13, 0.55), p=0.002   | 0.01, (-0.23, 0.24),<br>p=0.932  | -0.15, (-0.38, 0.11), p=0.256 |
| <b>LPS</b>               | 0.13, (-0.11, 0.35),<br>p=0.296  | 0.18, (-0.06, 0.4), p=0.14    | -                             | 0.07, (-0.17, 0.3), p=0.566  | 0.13, (-0.11, 0.36), p=0.268  | 0.04, (-0.2, 0.27), p=0.771   | 0.78, (0.64, 0.86),<br>p=0       | -0.02, (-0.27, 0.22), p=0.853 |
| <b>EndoCAb IgG</b>       | 0.16, (-0.08, 0.38),<br>p=0.192  | 0.22, (-0.02, 0.44), p=0.07   | 0.07, (-0.17, 0.3), p=0.566   | -                            | 0.23, (-0.01, 0.45), p=0.052  | 0.23, (-0.01, 0.45), p=0.054  | -0.14, (-0.36, 0.1),<br>p=0.258  | 0.13, (-0.12, 0.37), p=0.296  |
| <b>EndoCAb IgM</b>       | 0.01, (-0.23, 0.24),<br>p=0.951  | 0, (-0.24, 0.23),<br>p=0.972  | 0.13, (-0.11, 0.36), p=0.268  | 0.23, (-0.01, 0.45), p=0.052 | -                             | -0.14, (-0.36, 0.1), p=0.263  | -0.14, (-0.37, 0.09),<br>p=0.231 | -0.05, (-0.29, 0.2), p=0.695  |
| <b>LBP</b>               | 0.18, (-0.06, 0.4),<br>p=0.137   | 0.36, (0.13, 0.55), p=0.002   | 0.04, (-0.2, 0.27), p=0.771   | 0.23, (-0.01, 0.45), p=0.054 | -0.14, (-0.36, 0.1), p=0.263  | -                             | -0.02, (-0.25, 0.21),<br>p=0.854 | -0.05, (-0.29, 0.2), p=0.721  |
| <b>LPS/HDL</b>           | -0.04, (-0.27, 0.2),<br>p=0.767  | 0.01, (-0.23, 0.24), p=0.932  | 0.78, (0.64, 0.86), p=0       | -0.14, (-0.36, 0.1), p=0.258 | -0.14, (-0.37, 0.09), p=0.231 | -0.02, (-0.25, 0.21), p=0.854 | -                                | -0.04, (-0.29, 0.2), p=0.733  |
| <b>Calprotectin</b>      | -0.16, (-0.39, 0.09),<br>p=0.197 | -0.15, (-0.38, 0.11), p=0.256 | -0.02, (-0.27, 0.22), p=0.853 | 0.13, (-0.12, 0.37), p=0.296 | -0.05, (-0.29, 0.2), p=0.695  | -0.05, (-0.29, 0.2), p=0.721  | -0.04, (-0.29, 0.2),<br>p=0.733  | -                             |

**Supplemental Table 6.** Correlations in the control group. Spearman correlation coefficient (95% CI) was calculated.

| <b>Variable</b>                          | <b>CRO, mg/l</b>                 | <b>hsCRP, mg/l</b>            | <b>LPS, EU/ml</b>             | <b>endoCAb IgG, GMU/ml</b>    | <b>endoCAb IgM, MMU/ml</b>     | <b>LBP, µg/ml</b>             | <b>LPS/HDL</b>                   | <b>Calprotectin, µg/g</b>       |
|------------------------------------------|----------------------------------|-------------------------------|-------------------------------|-------------------------------|--------------------------------|-------------------------------|----------------------------------|---------------------------------|
| <b>Serum glucose</b>                     | 0.2, (-0.15, 0.51),<br>p=0.256   | -0.05, (-0.4, 0.31), p=0.778  | -0.13, (-0.46, 0.23), p=0.48  | -0.28, (-0.58, 0.08), p=0.119 | -0.24, (-0.55, 0.12), p=0.183  | 0.17, (-0.19, 0.49), p=0.343  | -0.21, (-0.52, 0.16),<br>p=0.255 | -0.14, (-0.48, 0.23), p=0.449   |
| <b>HbA1c</b>                             | 0.34, (-0.02, 0.62),<br>p=0.056  | 0.5, (0.16, 0.74),<br>p=0.004 | -0.13, (-0.46, 0.23), p=0.483 | 0.15, (-0.21, 0.48), p=0.404  | 0.24, (-0.12, 0.55), p=0.183   | 0.18, (-0.18, 0.5), p=0.318   | -0.13, (-0.46, 0.23),<br>p=0.487 | 0.17, (-0.21, 0.5),<br>p=0.373  |
| <b>eGFR</b>                              | -0.22, (-0.53, 0.13),<br>p=0.208 | -0.21, (-0.53, 0.16), p=0.249 | -0.11, (-0.44, 0.25), p=0.538 | 0.09, (-0.27, 0.43), p=0.619  | 0.06, (-0.29, 0.4), p=0.737    | -0.21, (-0.52, 0.15), p=0.248 | -0.09, (-0.43, 0.27),<br>p=0.624 | -0.06, (-0.41, 0.31), p=0.772   |
| <b>Albumin/creatinine ratio in urine</b> | -0.26, (-0.56, 0.09),<br>p=0.138 | -0.32, (-0.61, 0.05), p=0.081 | 0.02, (-0.33, 0.36), p=0.925  | 0.1, (-0.26, 0.44), p=0.578   | -0.19, (-0.51, 0.17), p=0.287  | -0.03, (-0.38, 0.32), p=0.865 | -0.02, (-0.37, 0.33),<br>p=0.898 | 0.2, (-0.18, 0.52),<br>p=0.298  |
| <b>Weight</b>                            | 0.39, (0.04, 0.65),<br>p=0.026   | 0.19, (-0.18, 0.52), p=0.296  | 0.23, (-0.14, 0.54), p=0.211  | 0.04, (-0.31, 0.39), p=0.811  | -0.44, (-0.69, -0.09), p=0.012 | 0.12, (-0.24, 0.45), p=0.498  | 0.35, (-0.01, 0.63),<br>p=0.05   | -0.02, (-0.38, 0.34), p=0.904   |
| <b>Body mass index</b>                   | 0.42, (0.07, 0.67),<br>p=0.016   | 0.38, (0.02, 0.66), p=0.034   | 0.13, (-0.23, 0.46), p=0.476  | 0.08, (-0.27, 0.42), p=0.654  | -0.15, (-0.48, 0.21), p=0.405  | 0.16, (-0.2, 0.48), p=0.387   | 0.27, (-0.09, 0.57),<br>p=0.136  | -0.1, (-0.45, 0.27),<br>p=0.586 |
| <b>Waist/height ratio</b>                | 0.37, (0.02, 0.64),<br>p=0.034   | 0.33, (-0.04, 0.62), p=0.074  | 0.19, (-0.18, 0.5), p=0.309   | 0.08, (-0.28, 0.42), p=0.661  | -0.2, (-0.52, 0.16), p=0.267   | 0.27, (-0.1, 0.57), p=0.141   | 0.23, (-0.14, 0.54),<br>p=0.21   | -0.15, (-0.49, 0.22), p=0.422   |
| <b>eGDR</b>                              | -0.34, (-0.62, 0.01),<br>p=0.051 | -0.26, (-0.57, 0.11), p=0.16  | -0.25, (-0.56, 0.11), p=0.16  | -0.1, (-0.44, 0.26), p=0.574  | 0.14, (-0.22, 0.47), p=0.444   | -0.13, (-0.46, 0.23), p=0.479 | -0.32, (-0.61, 0.04),<br>p=0.077 | -0.12, (-0.46, 0.25), p=0.534   |
| <b>HSI</b>                               | 0.46, (0.12, 0.7),<br>p=0.007    | 0.43, (0.07, 0.69), p=0.016   | 0.09, (-0.26, 0.43), p=0.605  | 0.07, (-0.28, 0.41), p=0.697  | -0.08, (-0.42, 0.28), p=0.671  | 0.14, (-0.22, 0.46), p=0.456  | 0.24, (-0.12, 0.55),<br>p=0.178  | -0.2, (-0.52, 0.18),<br>p=0.3   |
| <b>FLI</b>                               | 0.38, (0.02, 0.64),<br>p=0.031   | 0.24, (-0.13, 0.55), p=0.198  | 0.49, (0.16, 0.73), p=0.004   | 0.01, (-0.34, 0.36), p=0.958  | -0.42, (-0.68, -0.07), p=0.017 | 0.27, (-0.1, 0.57), p=0.14    | 0.54, (0.21, 0.76),<br>p=0.002   | 0.01, (-0.35, 0.37), p=0.953    |
| <b>ALT</b>                               | 0.49, (0.16, 0.73),<br>p=0.003   | 0.32, (-0.04, 0.61), p=0.076  | 0.12, (-0.24, 0.45), p=0.524  | 0.06, (-0.3, 0.4), p=0.764    | -0.1, (-0.43, 0.26), p=0.605   | 0.23, (-0.14, 0.54), p=0.215  | 0.31, (-0.06, 0.6),<br>p=0.087   | -0.13, (-0.47, 0.24), p=0.48    |
| <b>AST</b>                               | 0.31, (-0.05, 0.59),<br>p=0.081  | -0.02, (-0.38, 0.33), p=0.895 | 0, (-0.35, 0.35),<br>p=0.986  | 0.33, (-0.03, 0.62), p=0.063  | -0.04, (-0.39, 0.31), p=0.819  | 0.18, (-0.18, 0.5), p=0.311   | 0.13, (-0.23, 0.46),<br>p=0.493  | -0.13, (-0.47, 0.25), p=0.506   |

|                                 |                                  |                               |                                |                               |                                |                               |                               |                               |
|---------------------------------|----------------------------------|-------------------------------|--------------------------------|-------------------------------|--------------------------------|-------------------------------|-------------------------------|-------------------------------|
| <b>GGT</b>                      | 0.36, (0.01, 0.64),<br>p=0.037   | 0.29, (-0.08, 0.59), p=0.119  | 0.16, (-0.2, 0.49), p=0.368    | 0.41, (0.05, 0.67), p=0.021   | 0.13, (-0.23, 0.46), p=0.486   | 0.21, (-0.15, 0.53), p=0.238  | 0.3, (-0.06, 0.59), p=0.097   | -0.02, (-0.38, 0.34), p=0.901 |
| <b>Transglutaminase IgA</b>     | -0.4, (-0.66, -0.05),<br>p=0.021 | -0.33, (-0.62, 0.04), p=0.07  | -0.11, (-0.44, 0.25), p=0.557  | 0.22, (-0.15, 0.53), p=0.235  | 0.07, (-0.28, 0.41), p=0.696   | -0.12, (-0.45, 0.24), p=0.518 | -0.02, (-0.37, 0.33), p=0.907 | 0.37, (0, 0.65), p=0.041      |
| <b>Total bilirubin</b>          | -0.24, (-0.55, 0.11),<br>p=0.173 | 0.04, (-0.32, 0.39), p=0.84   | 0.09, (-0.26, 0.43), p=0.609   | 0.35, (-0.01, 0.63), p=0.052  | 0.03, (-0.32, 0.38), p=0.863   | -0.13, (-0.46, 0.23), p=0.484 | -0.02, (-0.36, 0.33), p=0.921 | -0.19, (-0.52, 0.19), p=0.318 |
| <b>Erythrocytes</b>             | 0.12, (-0.24, 0.44),<br>p=0.511  | 0.02, (-0.33, 0.38), p=0.899  | 0.45, (0.1, 0.7), p=0.01       | 0.03, (-0.32, 0.38), p=0.855  | -0.37, (-0.64, -0.01), p=0.039 | 0.31, (-0.05, 0.6), p=0.084   | 0.5, (0.16, 0.73), p=0.004    | 0.17, (-0.2, 0.51), p=0.355   |
| <b>Hemoglobin</b>               | -0.04, (-0.38, 0.31),<br>p=0.839 | -0.19, (-0.51, 0.18), p=0.312 | 0.43, (0.08, 0.69), p=0.014    | -0.1, (-0.44, 0.26), p=0.579  | -0.4, (-0.67, -0.05), p=0.022  | 0.32, (-0.04, 0.61), p=0.074  | 0.51, (0.18, 0.74), p=0.003   | 0.21, (-0.16, 0.53), p=0.26   |
| <b>Leukocytes</b>               | -0.2, (-0.51, 0.16),<br>p=0.276  | -0.09, (-0.43, 0.27), p=0.614 | 0.32, (-0.04, 0.61), p=0.075   | -0.2, (-0.52, 0.16), p=0.273  | -0.05, (-0.4, 0.3), p=0.77     | 0.34, (-0.02, 0.62), p=0.057  | 0.33, (-0.03, 0.62), p=0.062  | 0.3, (-0.07, 0.6), p=0.103    |
| <b>Total cholesterol</b>        | -0.06, (-0.39, 0.29),<br>p=0.746 | -0.23, (-0.54, 0.14), p=0.221 | 0.07, (-0.29, 0.41), p=0.721   | -0.12, (-0.45, 0.24), p=0.515 | -0.17, (-0.5, 0.19), p=0.339   | 0.01, (-0.34, 0.36), p=0.95   | -0.12, (-0.45, 0.24), p=0.505 | -0.1, (-0.44, 0.27), p=0.615  |
| <b>High-density cholesterol</b> | -0.24, (-0.55, 0.11),<br>p=0.17  | -0.15, (-0.48, 0.21), p=0.409 | -0.32, (-0.61, 0.04), p=0.073  | -0.19, (-0.51, 0.17), p=0.302 | 0.18, (-0.19, 0.5), p=0.336    | -0.21, (-0.52, 0.15), p=0.245 | -0.68, (-0.84, -0.4), p=0     | -0.27, (-0.58, 0.1), p=0.144  |
| <b>Low-density cholesterol</b>  | -0.09, (-0.42, 0.27),<br>p=0.637 | -0.21, (-0.52, 0.16), p=0.267 | -0.04, (-0.38, 0.31), p=0.836  | -0.05, (-0.4, 0.3), p=0.77    | -0.18, (-0.5, 0.18), p=0.322   | -0.01, (-0.36, 0.34), p=0.951 | -0.03, (-0.37, 0.32), p=0.872 | 0.16, (-0.21, 0.49), p=0.395  |
| <b>Tryglicerides</b>            | 0.28, (-0.07, 0.57),<br>p=0.112  | 0.06, (-0.31, 0.4), p=0.767   | 0.79, (0.57, 0.9), p=0         | -0.09, (-0.43, 0.27), p=0.614 | -0.6, (-0.8, -0.29), p=0       | 0.28, (-0.08, 0.58), p=0.118  | 0.67, (0.39, 0.84), p=0       | 0.17, (-0.2, 0.5), p=0.363    |
| <b>CRP</b>                      | -                                | 0.42, (0.06, 0.68), p=0.018   | 0.05, (-0.31, 0.39), p=0.796   | -0.02, (-0.37, 0.33), p=0.895 | -0.01, (-0.35, 0.34), p=0.973  | -0.02, (-0.36, 0.33), p=0.92  | 0.14, (-0.22, 0.46), p=0.455  | -0.22, (-0.54, 0.16), p=0.241 |
| <b>hsCRP</b>                    | 0.42, (0.06, 0.68),<br>p=0.018   | -                             | 0.23, (-0.14, 0.54), p=0.217   | 0.1, (-0.26, 0.44), p=0.584   | 0.19, (-0.18, 0.51), p=0.308   | 0.21, (-0.16, 0.53), p=0.254  | 0.2, (-0.17, 0.52), p=0.269   | -0.22, (-0.55, 0.17), p=0.252 |
| <b>LPS</b>                      | 0.05, (-0.31, 0.39),<br>p=0.796  | 0.23, (-0.14, 0.54), p=0.217  | -                              | -0.09, (-0.43, 0.27), p=0.627 | -0.41, (-0.67, -0.06), p=0.021 | 0.36, (0, 0.64), p=0.045      | 0.86, (0.71, 0.94), p=0       | 0.15, (-0.23, 0.49), p=0.432  |
| <b>EndoCab IgG</b>              | -0.02, (-0.37, 0.33),<br>p=0.895 | 0.1, (-0.26, 0.44), p=0.584   | -0.09, (-0.43, 0.27), p=0.627  | -                             | 0.11, (-0.25, 0.44), p=0.565   | -0.29, (-0.59, 0.07), p=0.103 | -0.02, (-0.37, 0.33), p=0.897 | 0, (-0.36, 0.37), p=0.984     |
| <b>EndoCab IgM</b>              | -0.01, (-0.35, 0.34),<br>p=0.973 | 0.19, (-0.18, 0.51), p=0.308  | -0.41, (-0.67, -0.06), p=0.021 | 0.11, (-0.25, 0.44), p=0.565  | -                              | -0.05, (-0.39, 0.3), p=0.775  | -0.28, (-0.58, 0.08), p=0.117 | -0.21, (-0.54, 0.17), p=0.267 |
| <b>LBP</b>                      | -0.02, (-0.36, 0.33),<br>p=0.92  | 0.21, (-0.16, 0.53), p=0.254  | 0.36, (0, 0.64), p=0.045       | -0.29, (-0.59, 0.07), p=0.103 | -0.05, (-0.39, 0.3), p=0.775   | -                             | 0.39, (0.03, 0.66), p=0.03    | -0.08, (-0.44, 0.29), p=0.673 |
| <b>LPS/HDL</b>                  | 0.14, (-0.22, 0.46),<br>p=0.455  | 0.2, (-0.17, 0.52), p=0.269   | 0.86, (0.71, 0.94), p=0        | -0.02, (-0.37, 0.33), p=0.897 | -0.28, (-0.58, 0.08), p=0.117  | 0.39, (0.03, 0.66), p=0.03    | -                             | 0.21, (-0.18, 0.54), p=0.284  |
| <b>Calprotectin</b>             | -0.22, (-0.54, 0.16),<br>p=0.241 | -0.22, (-0.55, 0.17), p=0.252 | 0.15, (-0.23, 0.49), p=0.432   | 0, (-0.36, 0.37), p=0.984     | -0.21, (-0.54, 0.17), p=0.267  | -0.08, (-0.44, 0.29), p=0.673 | 0.21, (-0.18, 0.54), p=0.284  | -                             |
